# Supplementary material for: Characterization of Vegetation Dynamics on Linear Features Using Airborne Laser Scanning and Ensemble Learning
Source: MDPI journal article supplement (doi:10.3390/f14030511), 2023-03-05
Supplement: s1 [file s1]

## Supplementary Materials

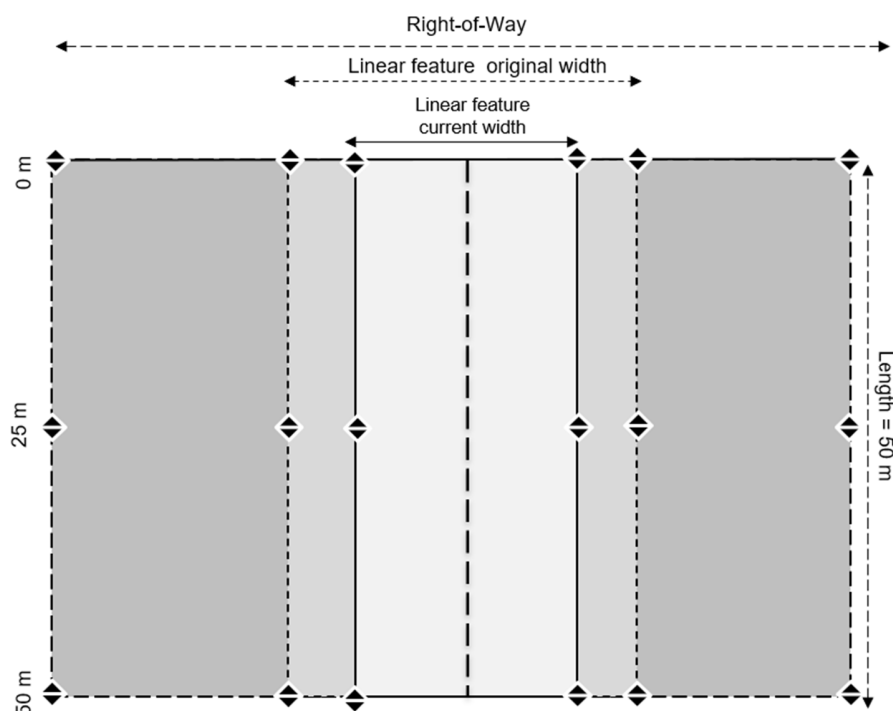

Figure S1: Field inventory plot design used to reconstruct the centerlines (Dimensions: 50m\*clearing width).

Table S1: Hyperparameters (ranges and types) and their definitions

|             | Hyperparameter | Description                                          | Type    | Start                              | End | Default    |
|-------------|----------------|------------------------------------------------------|---------|------------------------------------|-----|------------|
| <i>mars</i> | degree         | Number of retained terms                             | Integer | 1                                  | 3   | 1          |
|             | nprune         | Degree of interactions                               | Integer | 2                                  | 100 | 8          |
| <i>km</i>   | k              | Number of neighbors                                  | Integer | 5                                  | 20  | 7          |
|             | distance       | Metrics to measure the distance between observations | Integer | 1                                  | 5   | 2          |
|             | kernel         | types of kernel functions                            | Nominal | Rank, cos, inv, Gaussian, optimal. | -   | -          |
| <i>rf</i>   | mtry           | Number of variables to randomly sample               | Integer | 1                                  | 3   | $\sqrt{p}$ |

|     |                   |                                |          |         |       |      |       |
|-----|-------------------|--------------------------------|----------|---------|-------|------|-------|
|     |                   | as candidates at<br>each split |          |         |       |      |       |
| gbm | ntree             |                                |          | Integer | 250   | 3000 | 500   |
|     | shrinkage         |                                |          | Numeric | 0.001 | 0.1  | 0.001 |
|     | interaction.depth | Maximal<br>depth               | tree     | Integer | 1     | 9    | 1     |
|     | n.minobsinnode    | Minimal<br>node size           | terminal | Integer | 1     | 10   | 20    |

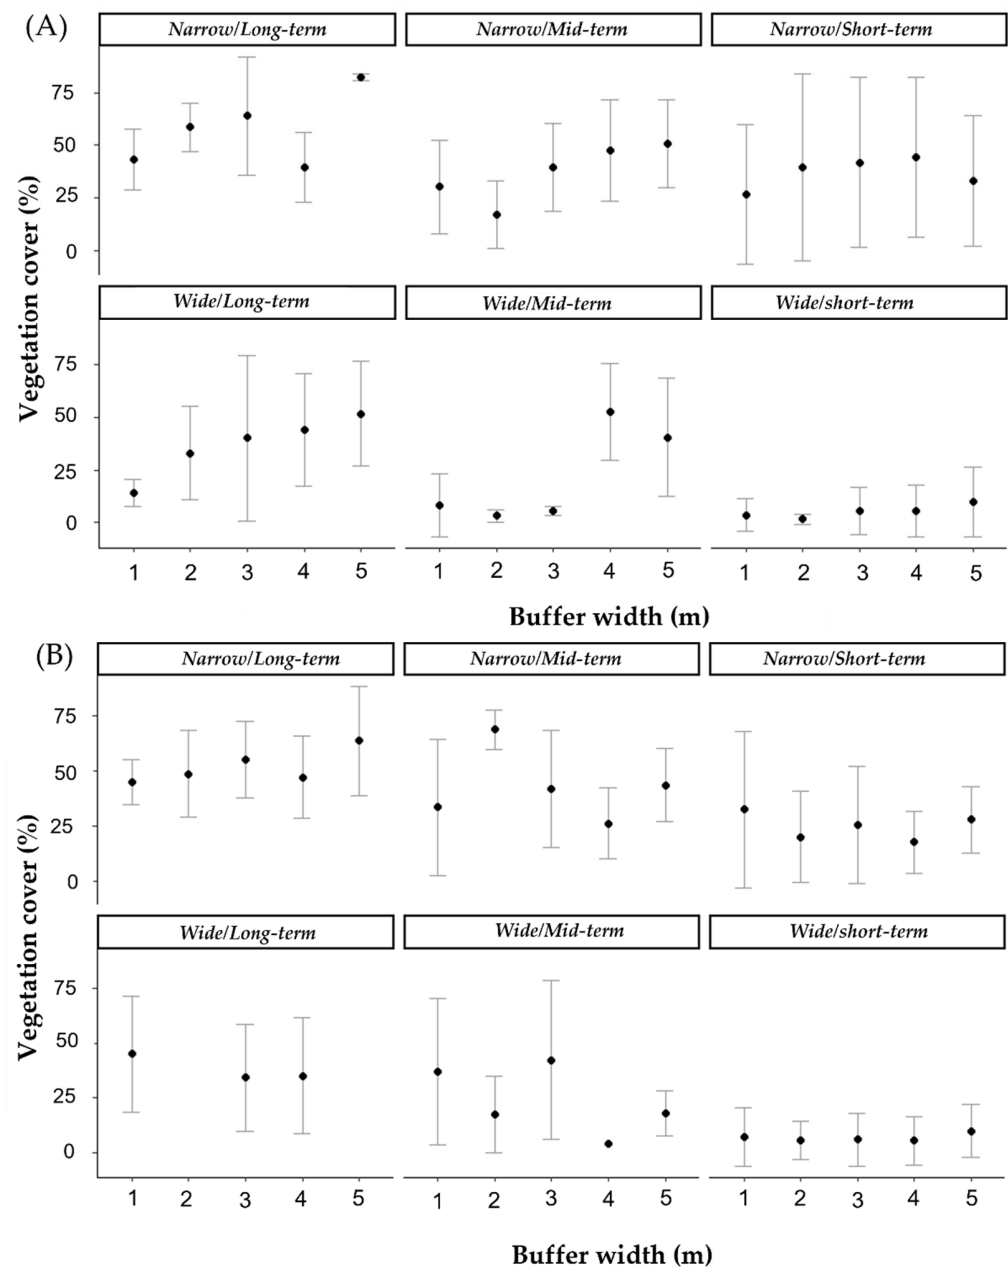

Figure S2: (A) Summary of vegetation cover predictions (means and means +/- standard deviation error bars) grouped by different forest road categories and timeframes, from cross-validated *rf* model ( $R^2=0.69$ ,  $RMSE=18.69\%$ ) recorded within the multi-buffers around the road centerlines, across forest road

types (wide roads and narrow forest roads) for the post-clearing timeframes: > 20 YPC (long-term, black boxes), [10–20] YPC (mid-term, dark grey boxes), and [0–10] YPC (short-term, light grey boxes). (B) Vegetation cover mean predictions using independently-validated *rf* model ( $R^2=0.62$ ,  $RMSE=20.29\%$ ) across forest road types and post-clearing timeframes.

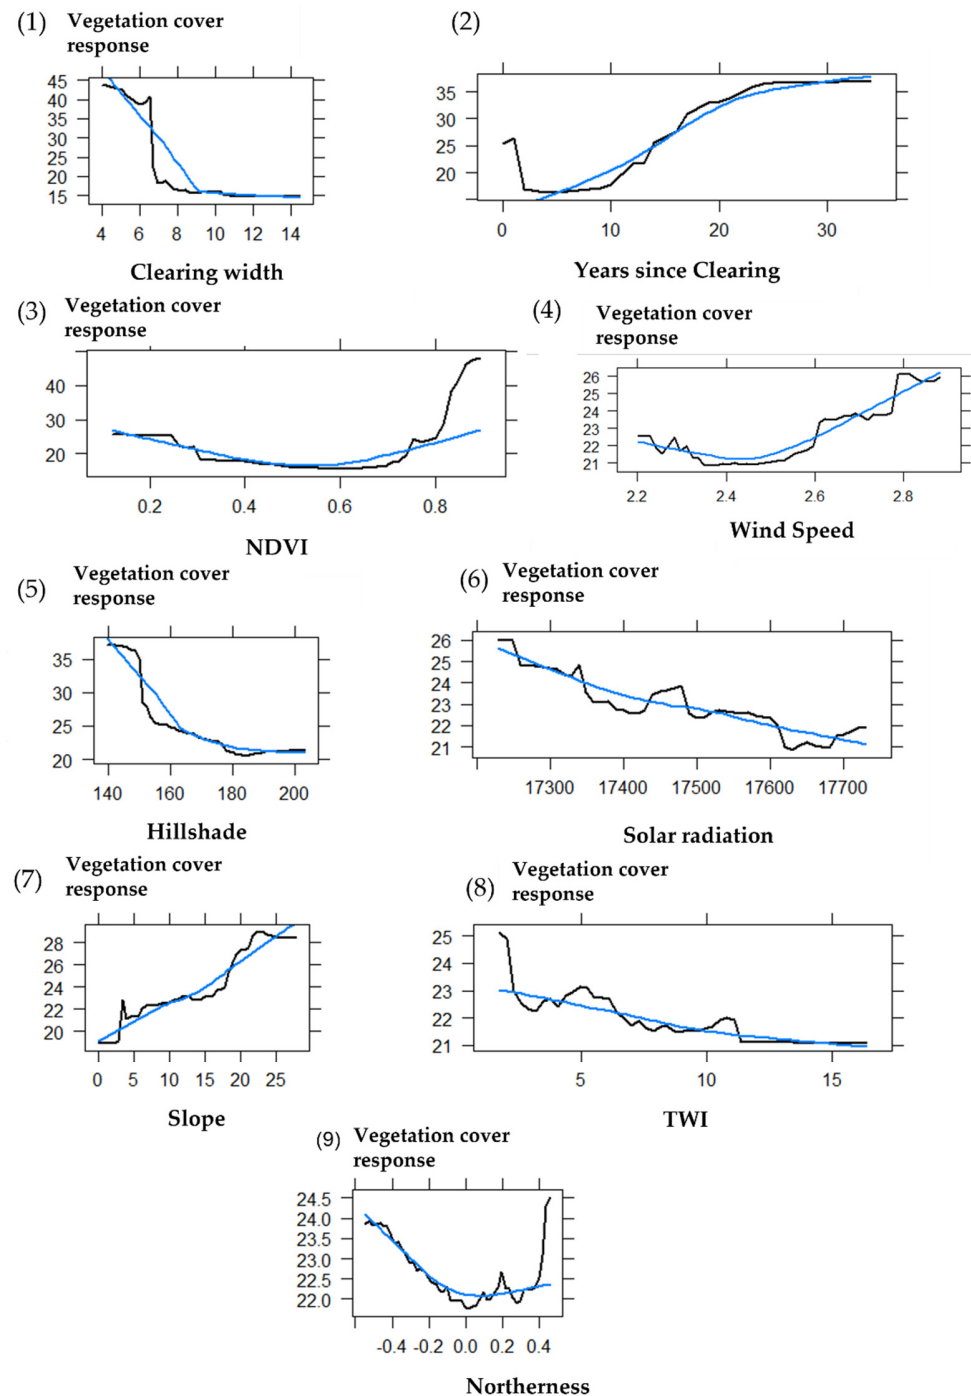

Figure S3: *rf*-based Partial dependence plots (black curves) showing impacts of single factor on vegetation cover when all remaining factors are constant. Smooth curves are shown in blue.
