# Supplementary material for: Characterization of Vegetation Dynamics on Linear Features Using Airborne Laser Scanning and Ensemble Learning
Source: MDPI journal article supplement (doi:10.3390/f14030511), 2023-03-05
Supplement: s1 [file s1]

Archive with 1 entries (1 files):
- forests-2176075-supplementary.pdf
